# Supplementary material for: Global Warming’s Six MTurks: A Secondary Analysis of a US-Based Online Crowdsourcing Market
Source: MDPI journal article supplement (doi:10.3390/ijerph19148320), 2022-07-07
Supplement: s1 [file s1]

**Table S1.** Survey Questions Used in this Analysis.

| Variable | Question                                                                                         | Answer options                                                                                                                                                                                                                                                                                                                               |
|----------|--------------------------------------------------------------------------------------------------|----------------------------------------------------------------------------------------------------------------------------------------------------------------------------------------------------------------------------------------------------------------------------------------------------------------------------------------------|
| Belief4  | How much do you think global warming will harm you personally?                                   | Not at all (1)<br>Only a little (2)<br>A moderate amount (3)<br>A great deal (4)<br>Don't know (0)                                                                                                                                                                                                                                           |
| Belief5  | How much do you think global warming will harm future generations?                               | Not at all (1)<br>Only a little (2)<br>A moderate amount (3)<br>A great deal (4)<br>Don't know (0)                                                                                                                                                                                                                                           |
| Inv15    | How worried are you about global warming?                                                        | Very worried (4)<br>Somewhat worried (3)<br>Not very worried (2)<br>Not at all worried (1)                                                                                                                                                                                                                                                   |
| Inv18    | How important is the issue of global warming to you personally?                                  | Not at all important (1)<br>Not too important (2)<br>Somewhat important (3)<br>Very important (4)<br>Extremely important (5)                                                                                                                                                                                                                 |
| sex      | What is your gender identity?                                                                    | Male (1)<br>Female (0)<br>Transgender Male (female to male) (2)<br>Transgender Female (male to female) (3)<br>Non-binary or Gender neutral (4)<br>Prefer to self describe: (5)                                                                                                                                                               |
| race     | Which of these groups would you say best describes your race and ethnicity? Mark all that apply. | White or Caucasian (1) Black or African American (2)<br>American Indian or Alaska Native (3) Asian or Pacific Islander (4) Hispanic or Latino (5) Prefer to self describe:                                                                                                                                                                   |
| state    | In which state do you currently reside?                                                          | List of 52 states                                                                                                                                                                                                                                                                                                                            |
| income   | What is your household's total income (in previous year, 2019) before taxes?                     | Less than \$10,000 (1)<br>\$10,000 to \$19,999 (2)<br>\$20,000 to \$29,999 (3)<br>\$30,000 to \$39,999 (4)<br>\$40,000 to \$49,999 (5)<br>\$50,000 to \$59,999 (6)<br>\$60,000 to \$69,999 (7)<br>\$70,000 to \$79,999 (8)<br>\$80,000 to \$89,999 (9)<br>\$90,000 to \$99,999 (10)<br>\$100,000 to \$149,999 (11)<br>\$150,000 or more (12) |

|           |                                                                                                 |                                                                                                                                                                                                                                                                                                                             |
|-----------|-------------------------------------------------------------------------------------------------|-----------------------------------------------------------------------------------------------------------------------------------------------------------------------------------------------------------------------------------------------------------------------------------------------------------------------------|
| education | What is the highest level of school you have completed or the highest degree you have received? | Less than high school degree (1)<br>High school graduate (high school diploma or equivalent including GED) (2)<br>Some college but no degree (3)<br>Associate degree in college (2-year) (4)<br>Bachelor's degree in college (4-year) (5)<br>Master's degree (6)<br>Doctoral degree (7)<br>Professional degree (JD, MD) (8) |
|-----------|-------------------------------------------------------------------------------------------------|-----------------------------------------------------------------------------------------------------------------------------------------------------------------------------------------------------------------------------------------------------------------------------------------------------------------------------|

**Table S2.** Normalization of our survey demographics to GMUs.

| Variable Normalization             | MTurk Variables                                                        | Ipsos Categories                              | US Census Categories (ACS 2019, 2010 Census)                                                   |
|------------------------------------|------------------------------------------------------------------------|-----------------------------------------------|------------------------------------------------------------------------------------------------|
| Gender identity to Sex             | Male, Transgender Male                                                 | Male                                          | Male                                                                                           |
|                                    | Female, Transgender Female                                             | Female                                        | Female                                                                                         |
|                                    | Non-Binary or Gender Neutral, or Prefer to self-describe               | Other (not originally included in GMU survey) | N/A                                                                                            |
| Age to Generation Group            | Age <23                                                                | iGen (1997 -)                                 | Sum of age groups 5-24 years                                                                   |
|                                    | 24 to 39                                                               | Millenials (1981 – 1996)                      | Sum of age groups 25-39 years                                                                  |
|                                    | 40 to 55                                                               | Generation X (1965 – 1980)                    | Age group 40-54 years                                                                          |
|                                    | 56 to 74                                                               | Baby Boomers (1946 – 1964)                    | Sum of age groups 55-74 years                                                                  |
|                                    | 75 to 92                                                               | Silent (1928 – 1945)                          | Sum of age groups 75-84, 85 years and over                                                     |
|                                    | No participants                                                        | Greatest (Before 1928)                        | N/A                                                                                            |
| Education level to Education Group | Less than high school degree                                           | Less than high school                         | 1st - 4th grade<br>5th - 6th grade<br>7th - 8th grade<br>9th grade<br>10th grade<br>11th grade |
|                                    | High school graduate (high school diploma or equivalent including GED) | High school                                   | High school graduate                                                                           |
|                                    | Some college but no degree, Associate degree in college (2-year)       | Some College                                  | Some college, no degree, Associate's degree, occupational                                      |

|                              |                                                                                                       |                             |                                                                                                                                                                                                                                                                                                                                                                          |
|------------------------------|-------------------------------------------------------------------------------------------------------|-----------------------------|--------------------------------------------------------------------------------------------------------------------------------------------------------------------------------------------------------------------------------------------------------------------------------------------------------------------------------------------------------------------------|
|                              |                                                                                                       |                             | Associate's degree, academic                                                                                                                                                                                                                                                                                                                                             |
|                              | Bachelor's degree in college (4-year), Master's degree, Doctoral degree, Professional degree (JD, MD) | Bachelor's degree or higher | Bachelor's degree<br>Master's degree<br>Professional degree<br>Doctoral degree                                                                                                                                                                                                                                                                                           |
| Income level to Income Group | Less than \$10,000,<br>\$10,000 to \$19,999,<br>\$20,000 to \$29,999                                  | <\$25K                      | Under \$5,000<br>\$5,000 to \$9,999<br>\$10,000 to \$14,999<br>\$15,000 to \$19,999<br>\$20,000 to \$24,999                                                                                                                                                                                                                                                              |
|                              | \$30,000 to \$39,999,<br>\$40,000 to \$49,999                                                         | \$25K - <\$50K              | \$25,000 to \$29,999<br>\$30,000 to \$34,999<br>\$35,000 to \$39,999<br>\$40,000 to \$44,999<br>\$45,000 to \$49,999                                                                                                                                                                                                                                                     |
|                              | \$50,000 to \$59,999,<br>\$60,000 to \$69,999,<br>\$70,000 to \$79,999                                | \$50K - <\$75K              | \$50,000 to \$54,999<br>\$55,000 to \$59,999<br>\$60,000 to \$64,999<br>\$65,000 to \$69,999<br>\$70,000 to \$74,999                                                                                                                                                                                                                                                     |
|                              | \$80,000 to \$89,999,<br>\$90,000 to \$99,999                                                         | \$75K - <\$100K             | \$75,000 to \$79,999<br>\$80,000 to \$84,999<br>\$85,000 to \$89,999<br>\$90,000 to \$94,999<br>\$95,000 to \$99,999                                                                                                                                                                                                                                                     |
|                              | \$100,000 to \$149,999                                                                                | \$100K - <\$125K            | \$100,000 to \$104,999<br>\$105,000 to \$109,999<br>\$110,000 to \$114,999<br>\$115,000 to \$119,999<br>\$120,000 to \$124,999                                                                                                                                                                                                                                           |
|                              | \$150,000 or more                                                                                     | \$125K+                     | \$125,000 to \$129,999<br>\$130,000 to \$134,999<br>\$135,000 to \$139,999<br>\$140,000 to \$144,999<br>\$145,000 to \$149,999<br>\$150,000 to \$154,999<br>\$155,000 to \$159,999<br>\$160,000 to \$164,999<br>\$165,000 to \$169,999<br>\$170,000 to \$174,999<br>\$175,000 to \$179,999<br>\$180,000 to \$184,999<br>\$185,000 to \$189,999<br>\$190,000 to \$194,999 |

|                                            |                                                                                                                   |                        |                                              |
|--------------------------------------------|-------------------------------------------------------------------------------------------------------------------|------------------------|----------------------------------------------|
|                                            |                                                                                                                   |                        | \$195,000 to \$199,999<br>\$200,000 and over |
| Race and Ethnicity to<br>Race/Ethnic Group | White, Non-Hispanic                                                                                               | White, Non-Hispanic    | White, Non-Hispanic                          |
|                                            | Black, Non-Hispanic                                                                                               | Black, Non-Hispanic    | Black, Non-Hispanic                          |
|                                            | Hispanic                                                                                                          | Hispanic               | Hispanic                                     |
|                                            | 2+ Races, Non-Hispanic                                                                                            | 2+ Races, Non-Hispanic | 2+ Races, Non-Hispanic                       |
|                                            | American Indian or<br>Alaska Native, Asian or<br>Pacific Islander, Prefer<br>to self-describe AND<br>Non-Hispanic | Other, Non-Hispanic    | Other, Non-Hispanic                          |
| State to Region                            | CT, MI, MA, NH, NJ,<br>NY, PA, RI                                                                                 | Northeast              | Northeast                                    |
|                                            | IL, IN, IA, KS, MI, MN,<br>MO, NE, ND, OH, WI                                                                     | Midwest                | Midwest                                      |
|                                            | AL, AK, FL, GA, KT,<br>LO, MA, MS, NC, OK,<br>SC, TN, TX, VI, WV                                                  | South                  | South                                        |
|                                            | AZ, CA, CO, HI, ID,<br>MT, NV, NM, OR, UT,<br>WA                                                                  | West                   | West                                         |

Source: U.S. Census Bureau, Current Population Survey, 2020 Annual Social and Economic Supplement (CPS ASEC). Available online: <https://www.census.gov/data/tables/time-series/demo/income-poverty/cps-hinc/hinc-01.2019.html> (accessed on July 5th, 2022).
